# Supplementary material for: Comparison of sandwich and fingers-crossing type WO3/BiVO4 multilayer heterojunctions for photoelectrochemical water oxidation
Source: Royal Society of Chemistry journal article supplement (doi:10.1039/c5ra25601a), 2016-01-01
Supplement: c5ra25601a1.pdf [file c5ra25601a1.pdf]

Supporting Information

## Comparison of Sandwich and Fingers-crossing type $\text{WO}_3/\text{BiVO}_4$

### Multilayer Heterojunctions for Photoelectrochemical Water

#### Oxidation

Cong Liu, Jinzhan Su\* and Liejin Guo

International Research Center for Renewable Energy, State Key Laboratory of Multiphase Flow,  
Xi'an Jiaotong University, Xi'an, Shaanxi 710049, P. R. China

E-mail: [j.su@mail.xjtu.edu.cn](mailto:j.su@mail.xjtu.edu.cn)

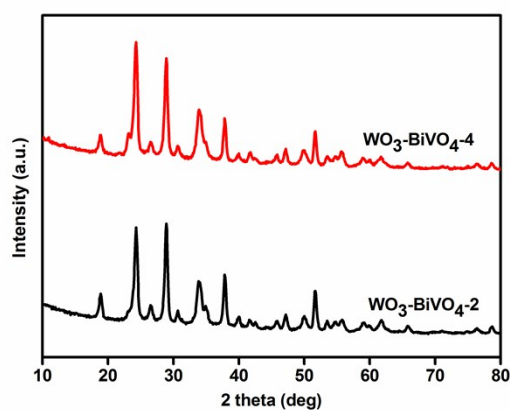

Fig.S1 X-Ray diffraction patterns of sample  $\text{WO}_3\text{-BiVO}_4\text{-2}$  and  $\text{WO}_3\text{-BiVO}_4\text{-4}$ .

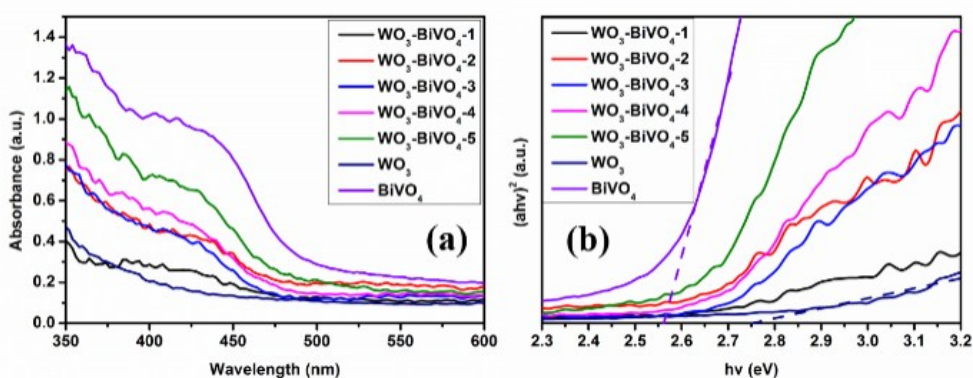

Fig.S2 UV-vis adsorption spectra (a) and Tauc plot (b) of fingers-crossing heterojunction with different number of  $\text{WO}_3/\text{BiVO}_4$  layers and bare  $\text{WO}_3$  or  $\text{BiVO}_4$  thin films.

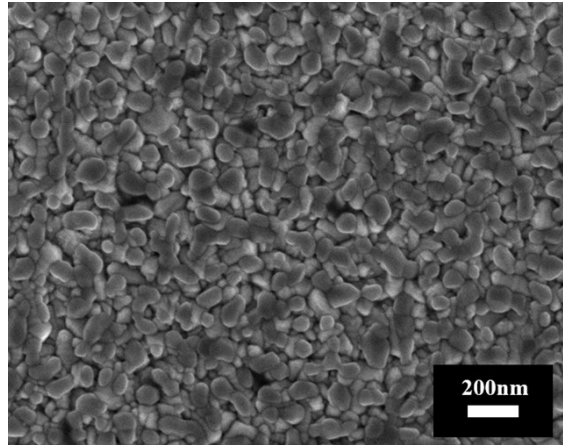

Fig.S3 SEM images of BiVO<sub>4</sub> with a concentration of precursor is 0.0625 M.

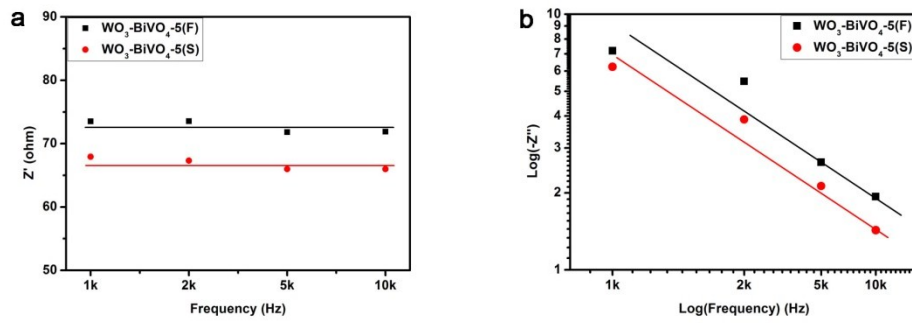

Fig.S4 The dependence of real impedance on frequency and log-log dependence of imaginary impedance on frequency.
